# Supplementary material
Source: Research Square preprint supplement (doi:10.21203/rs.3.rs-9167048/v1)

**Supplementary data 2**

Full-length, original and unprocessed gel images corresponding to Fig. S2 A, C, D, E, and G. The white dashed outlines indicate the full-length boundaries of the intact gels. The regions demarcated by black borders correspond to the cropped areas used in the main figures.


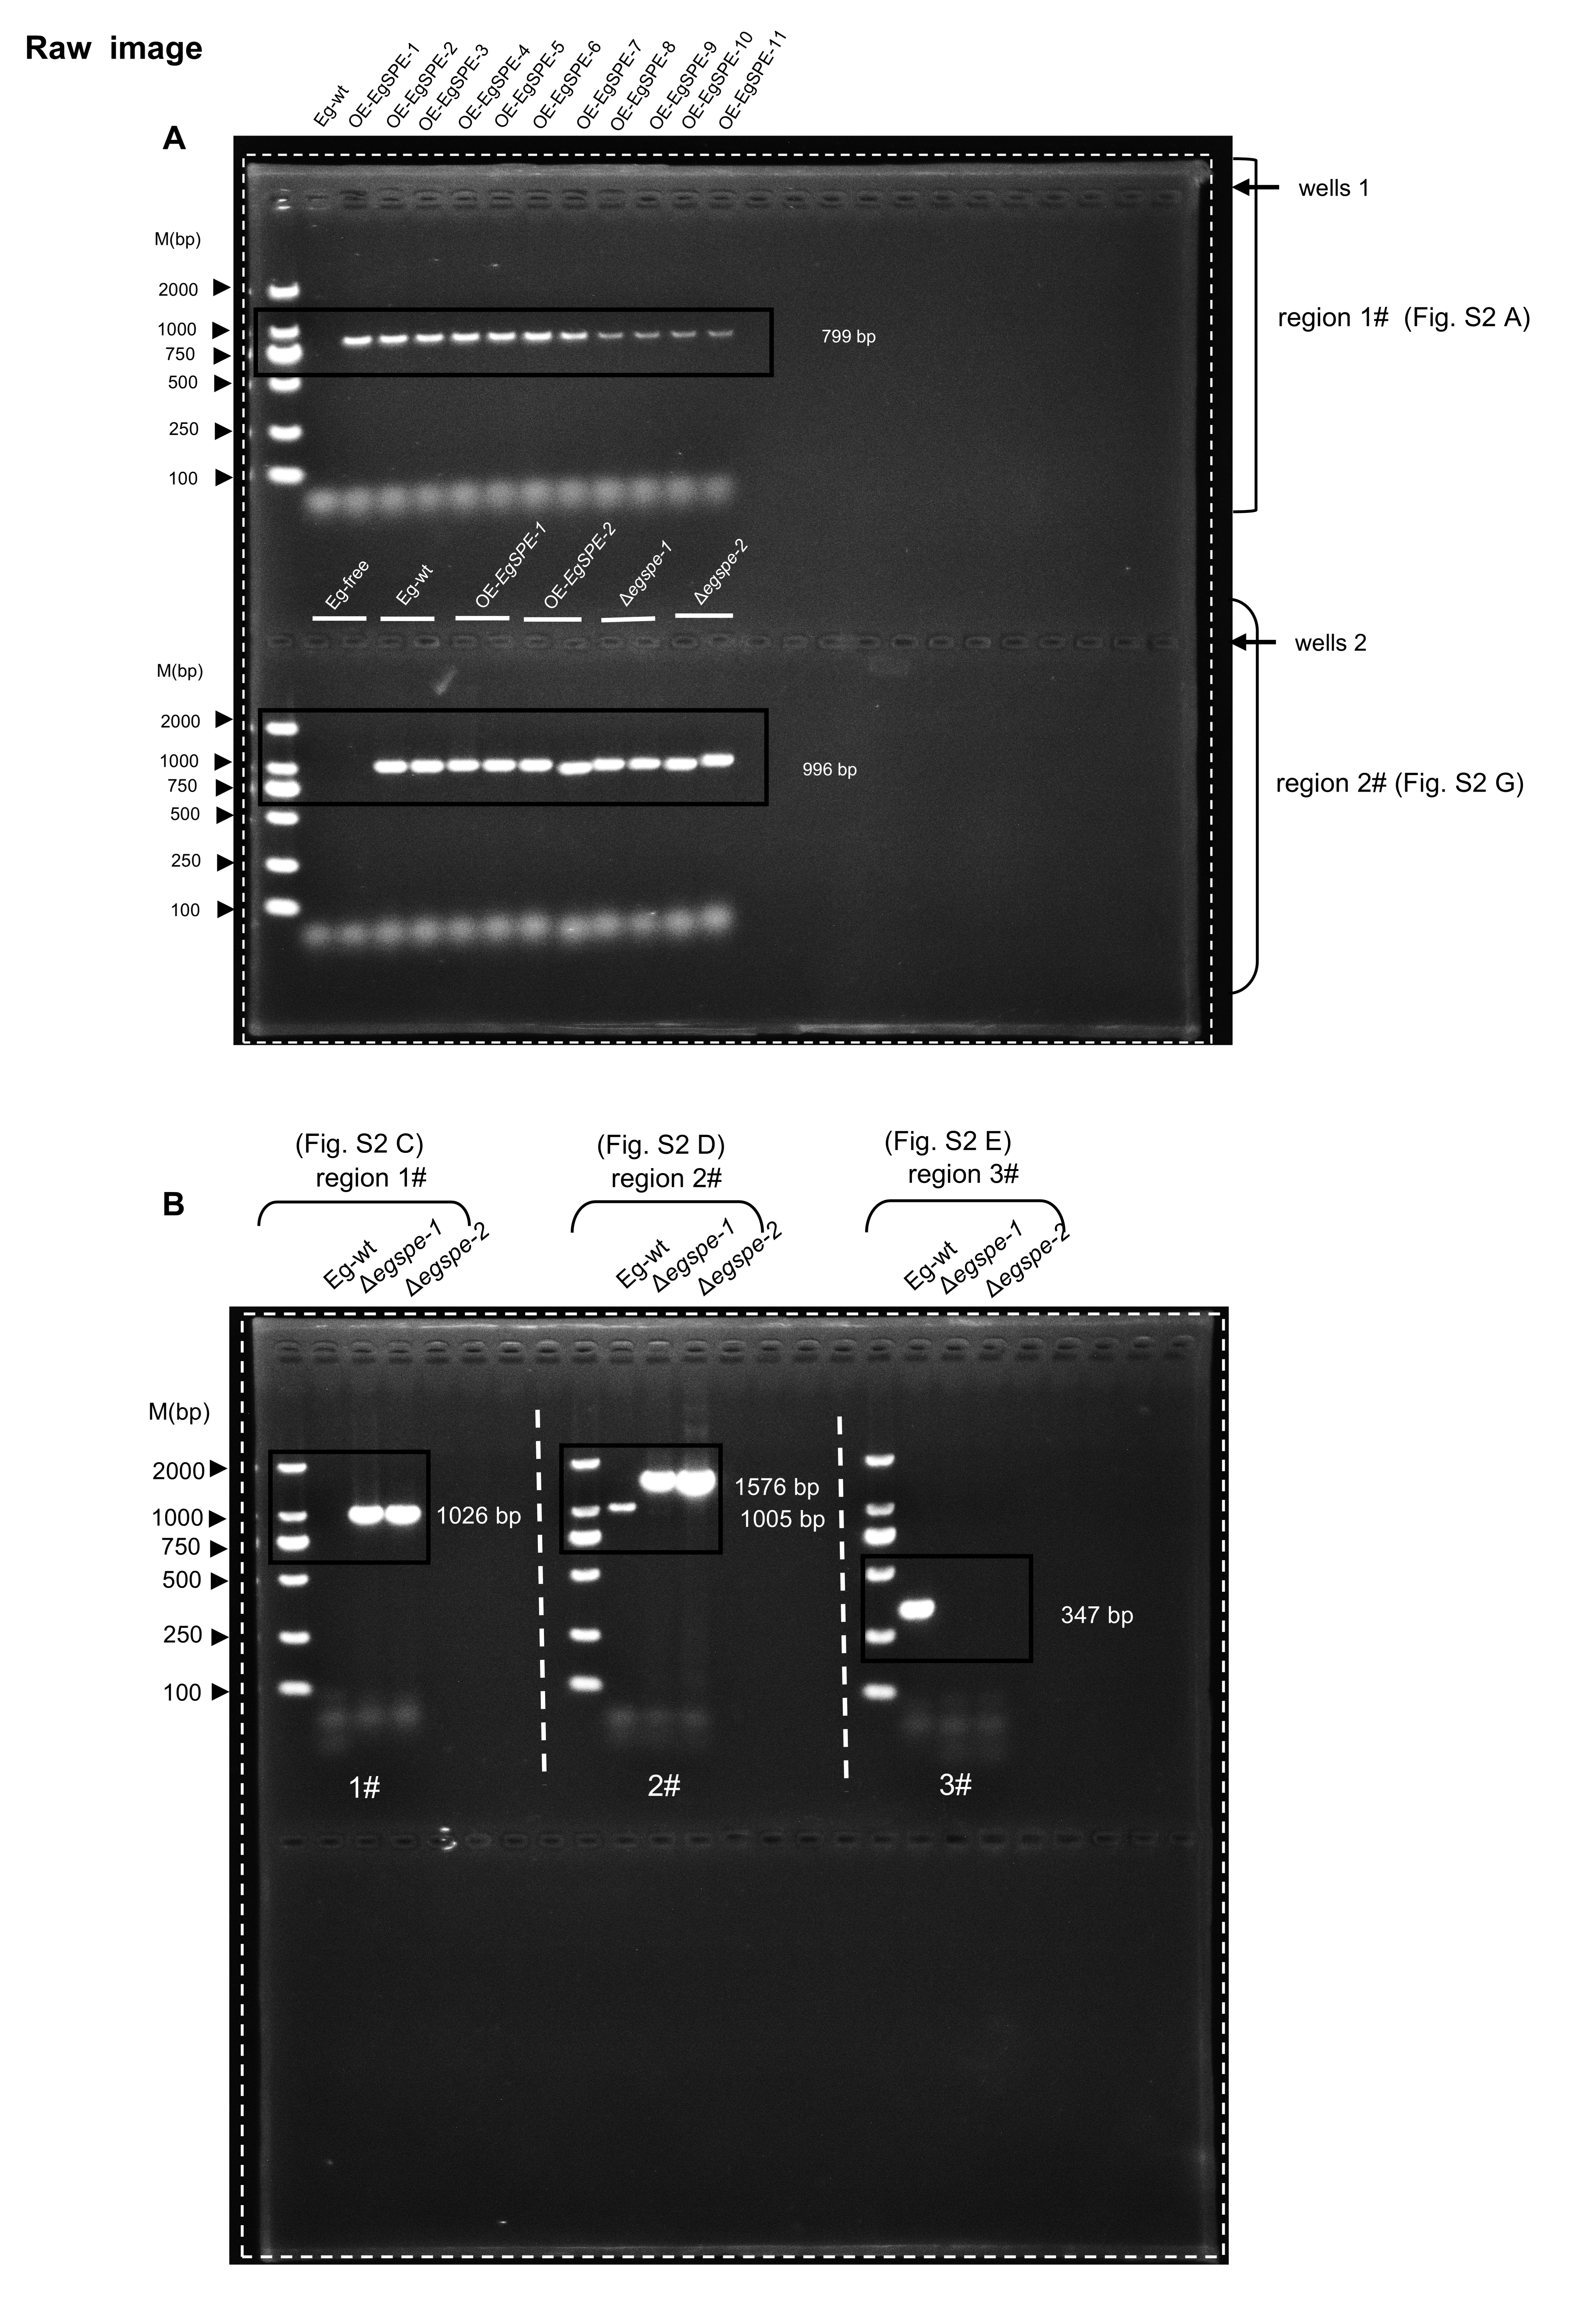

Supplement: Supplementary file 1 [file 2e33dcbfdf195eb4a772f831.docx]
