# Supplementary material
Source: Research Square preprint supplement (doi:10.21203/rs.3.rs-9167048/v1)

| **Name** | **Sequences (5’-3’)** |
| --- | --- |
| *idtG-*F | ATGGCGGCAGATAACTTTCCA |
| *idtG-*R | CCGTGGTTTTATTGCTAAATTGTT |
| *EgSPE-*F | CACCATGAAGTTCGTTGCAGTCACCG |
| *EgSPE-*R | AGCTCTCAAGGGAGGGAACTG |
| *pCT74-EgSPE*F | TGAATGAATATAGGCCAAGCTTATGAAGTTCGTTGCAGTCACCG |
| *pCT74-EgSPE*R | GGTACGTCGTATGGGTAAAGCTTAGCTCTCAAGGGAGGGAACTG |
| *pCT74-HA*F | GACGTACCAGATTACGCTGGGTAAAGCGGCCGCCCGGC |
| *pCT74-HA*R | AAGCTTGGCCTATATTCATTCATTGTCAGC |
| *ToxA-*F | TGGAATGCATGGAGGAGTTCTG |
| *pCT74jianding-HA*R | TTACCCAGCGTAATCTGGTACG |
| *EgSPE-up*F | GACAACGCCAGACGGGAGTCT |
| *EgSPE-up*R | CTTGGCTCATGGAGCCCTTTAG |
| *EgSPE-tef*F | TAAAGGGCTCCATGAGCCAAGTGTGTCTGCCTCTAGAGTGATG |
| *EgSPE-tef*R | GGTGAGTTCAGGCTTTTTCATGACCCTTTGGCTCGCTTAGTCAG |
| *EgSPE-Hyg*F | ATGAAAAAGCCTGAACTCACCGC |
| *EgSPE-Hyg*R | AGTTCTACCATAACTTATCAGCTATTCCTTTGCCCTCGGACGAG |
| *EgSPE-down*F | CTGATAAGTTATGGTAGAACTAGT |
| *EgSPE-down*R | GGTGACTGCAACGAACTTCATG |
| *EgSPE-out*F | CTCACTCCGAGGCAACCGGC |
| *EgSPE-out*R | GCCAGTAGGGTCGTAGTCTCAC |
| *TYB-Hyg*F | TATTGCATCTCCCGCCGTGC |
| *TYB-Hyg*R | TGCAAGCTCCGGATGCCTC |
| *EgSPE-q*F | ACGTACAGGTGCAATAAGGC |
| *EgSPE-q*R | AACTTGCACACAGTCTGACG |
| *qFactor-*F | AAAAAGCAACCGAATGCAAG |
| *qFactor-*R | CGAGACGACATAACTACATGTATCAAA |

**Table S1. Primer used in this study**

**Figure S1. Prolonged cultivation results in poor protoplast condition.**


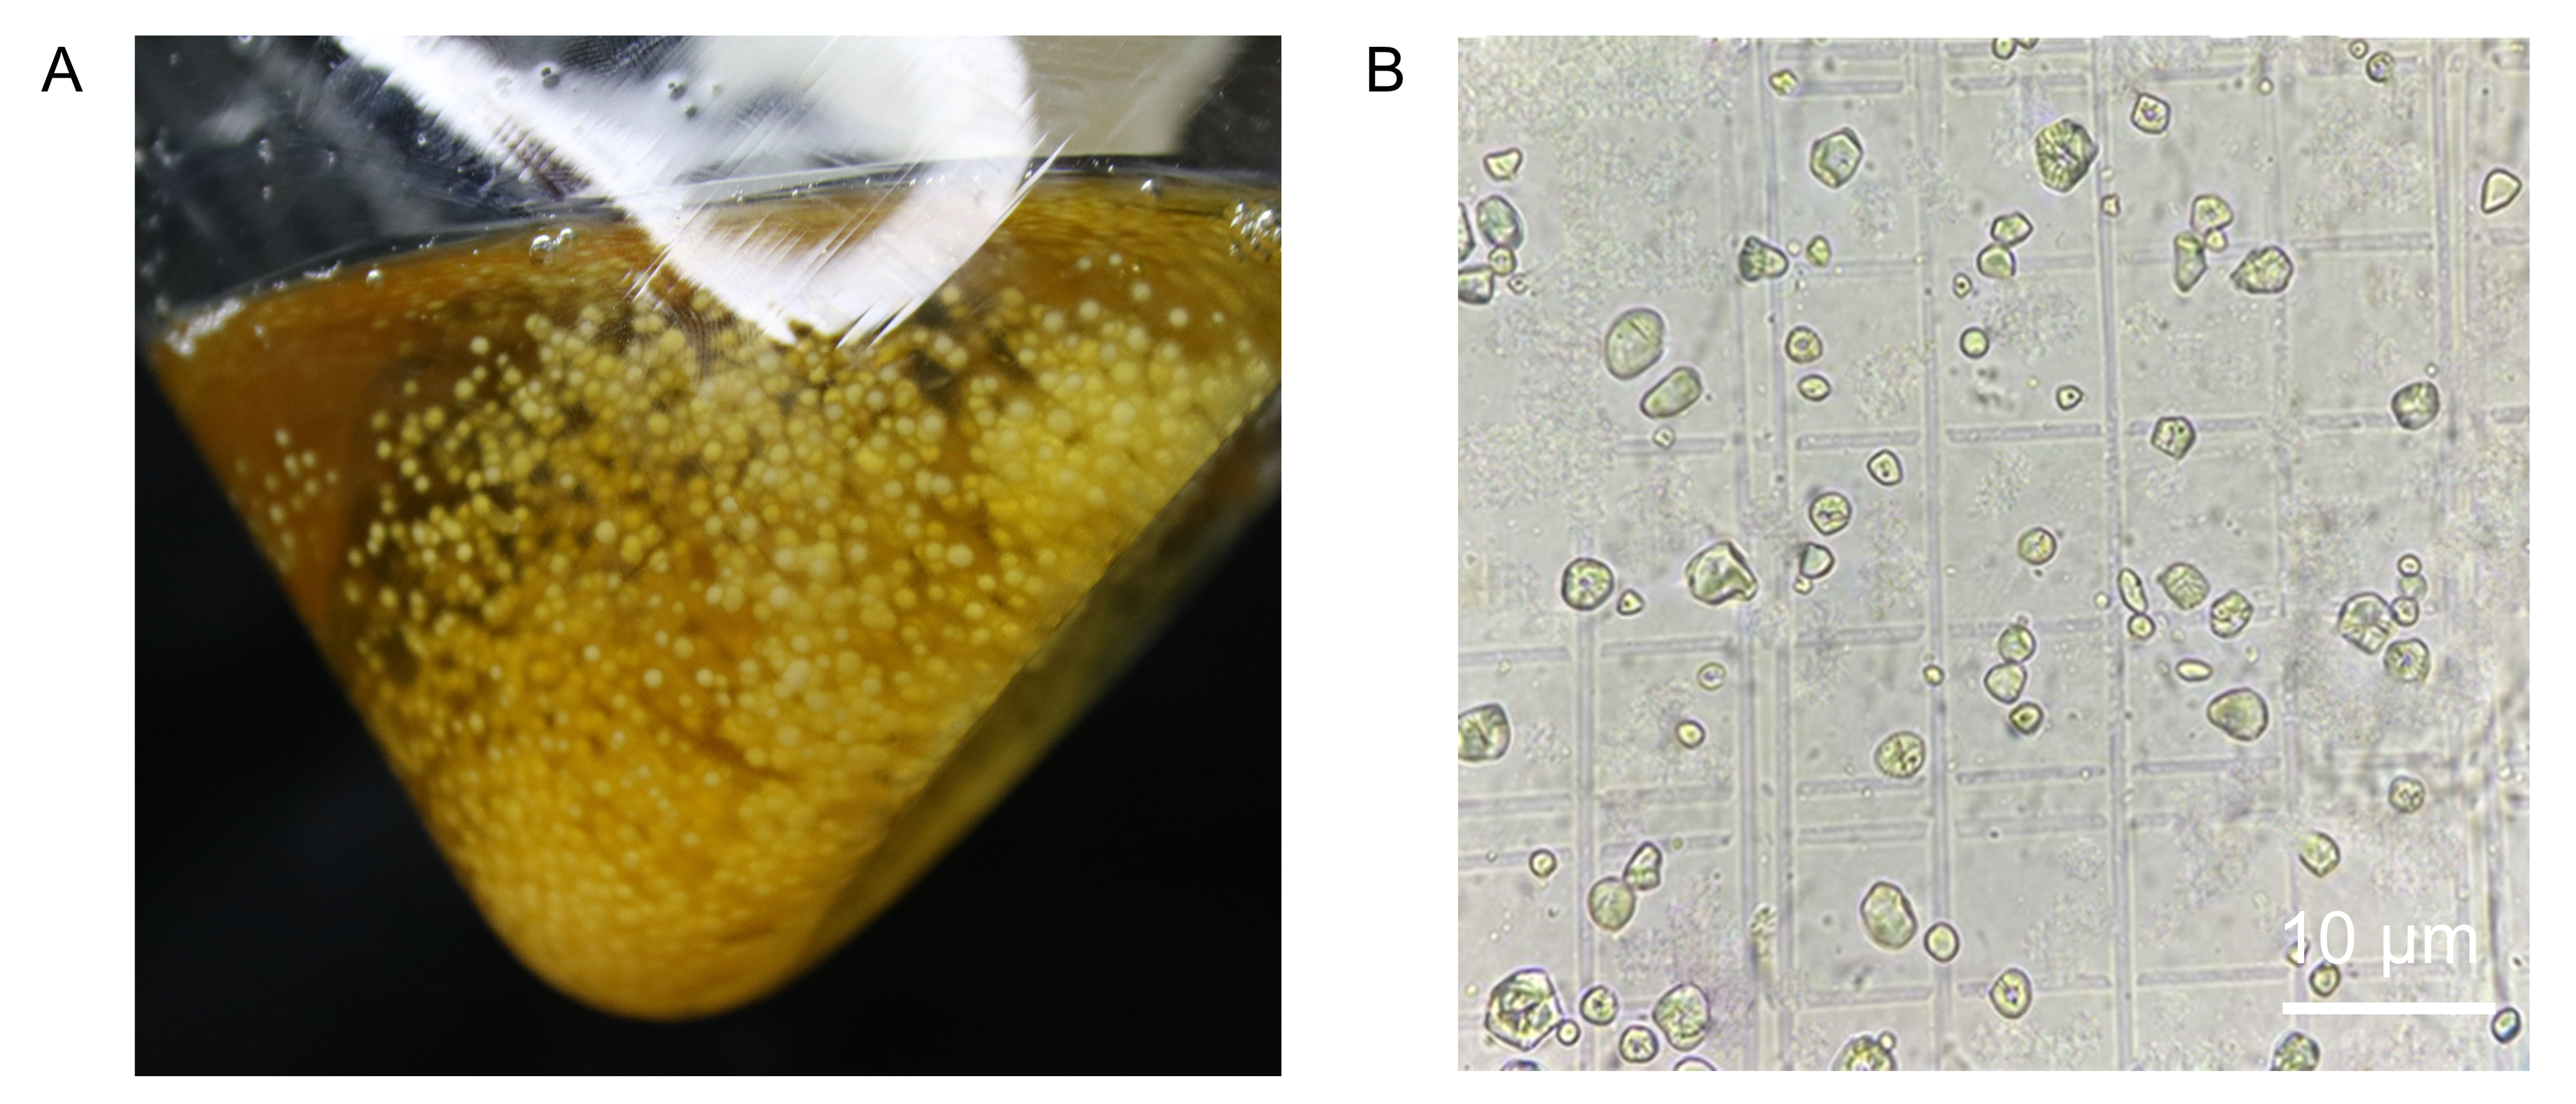


**Figure S2. Identification of genetically modified strains.**


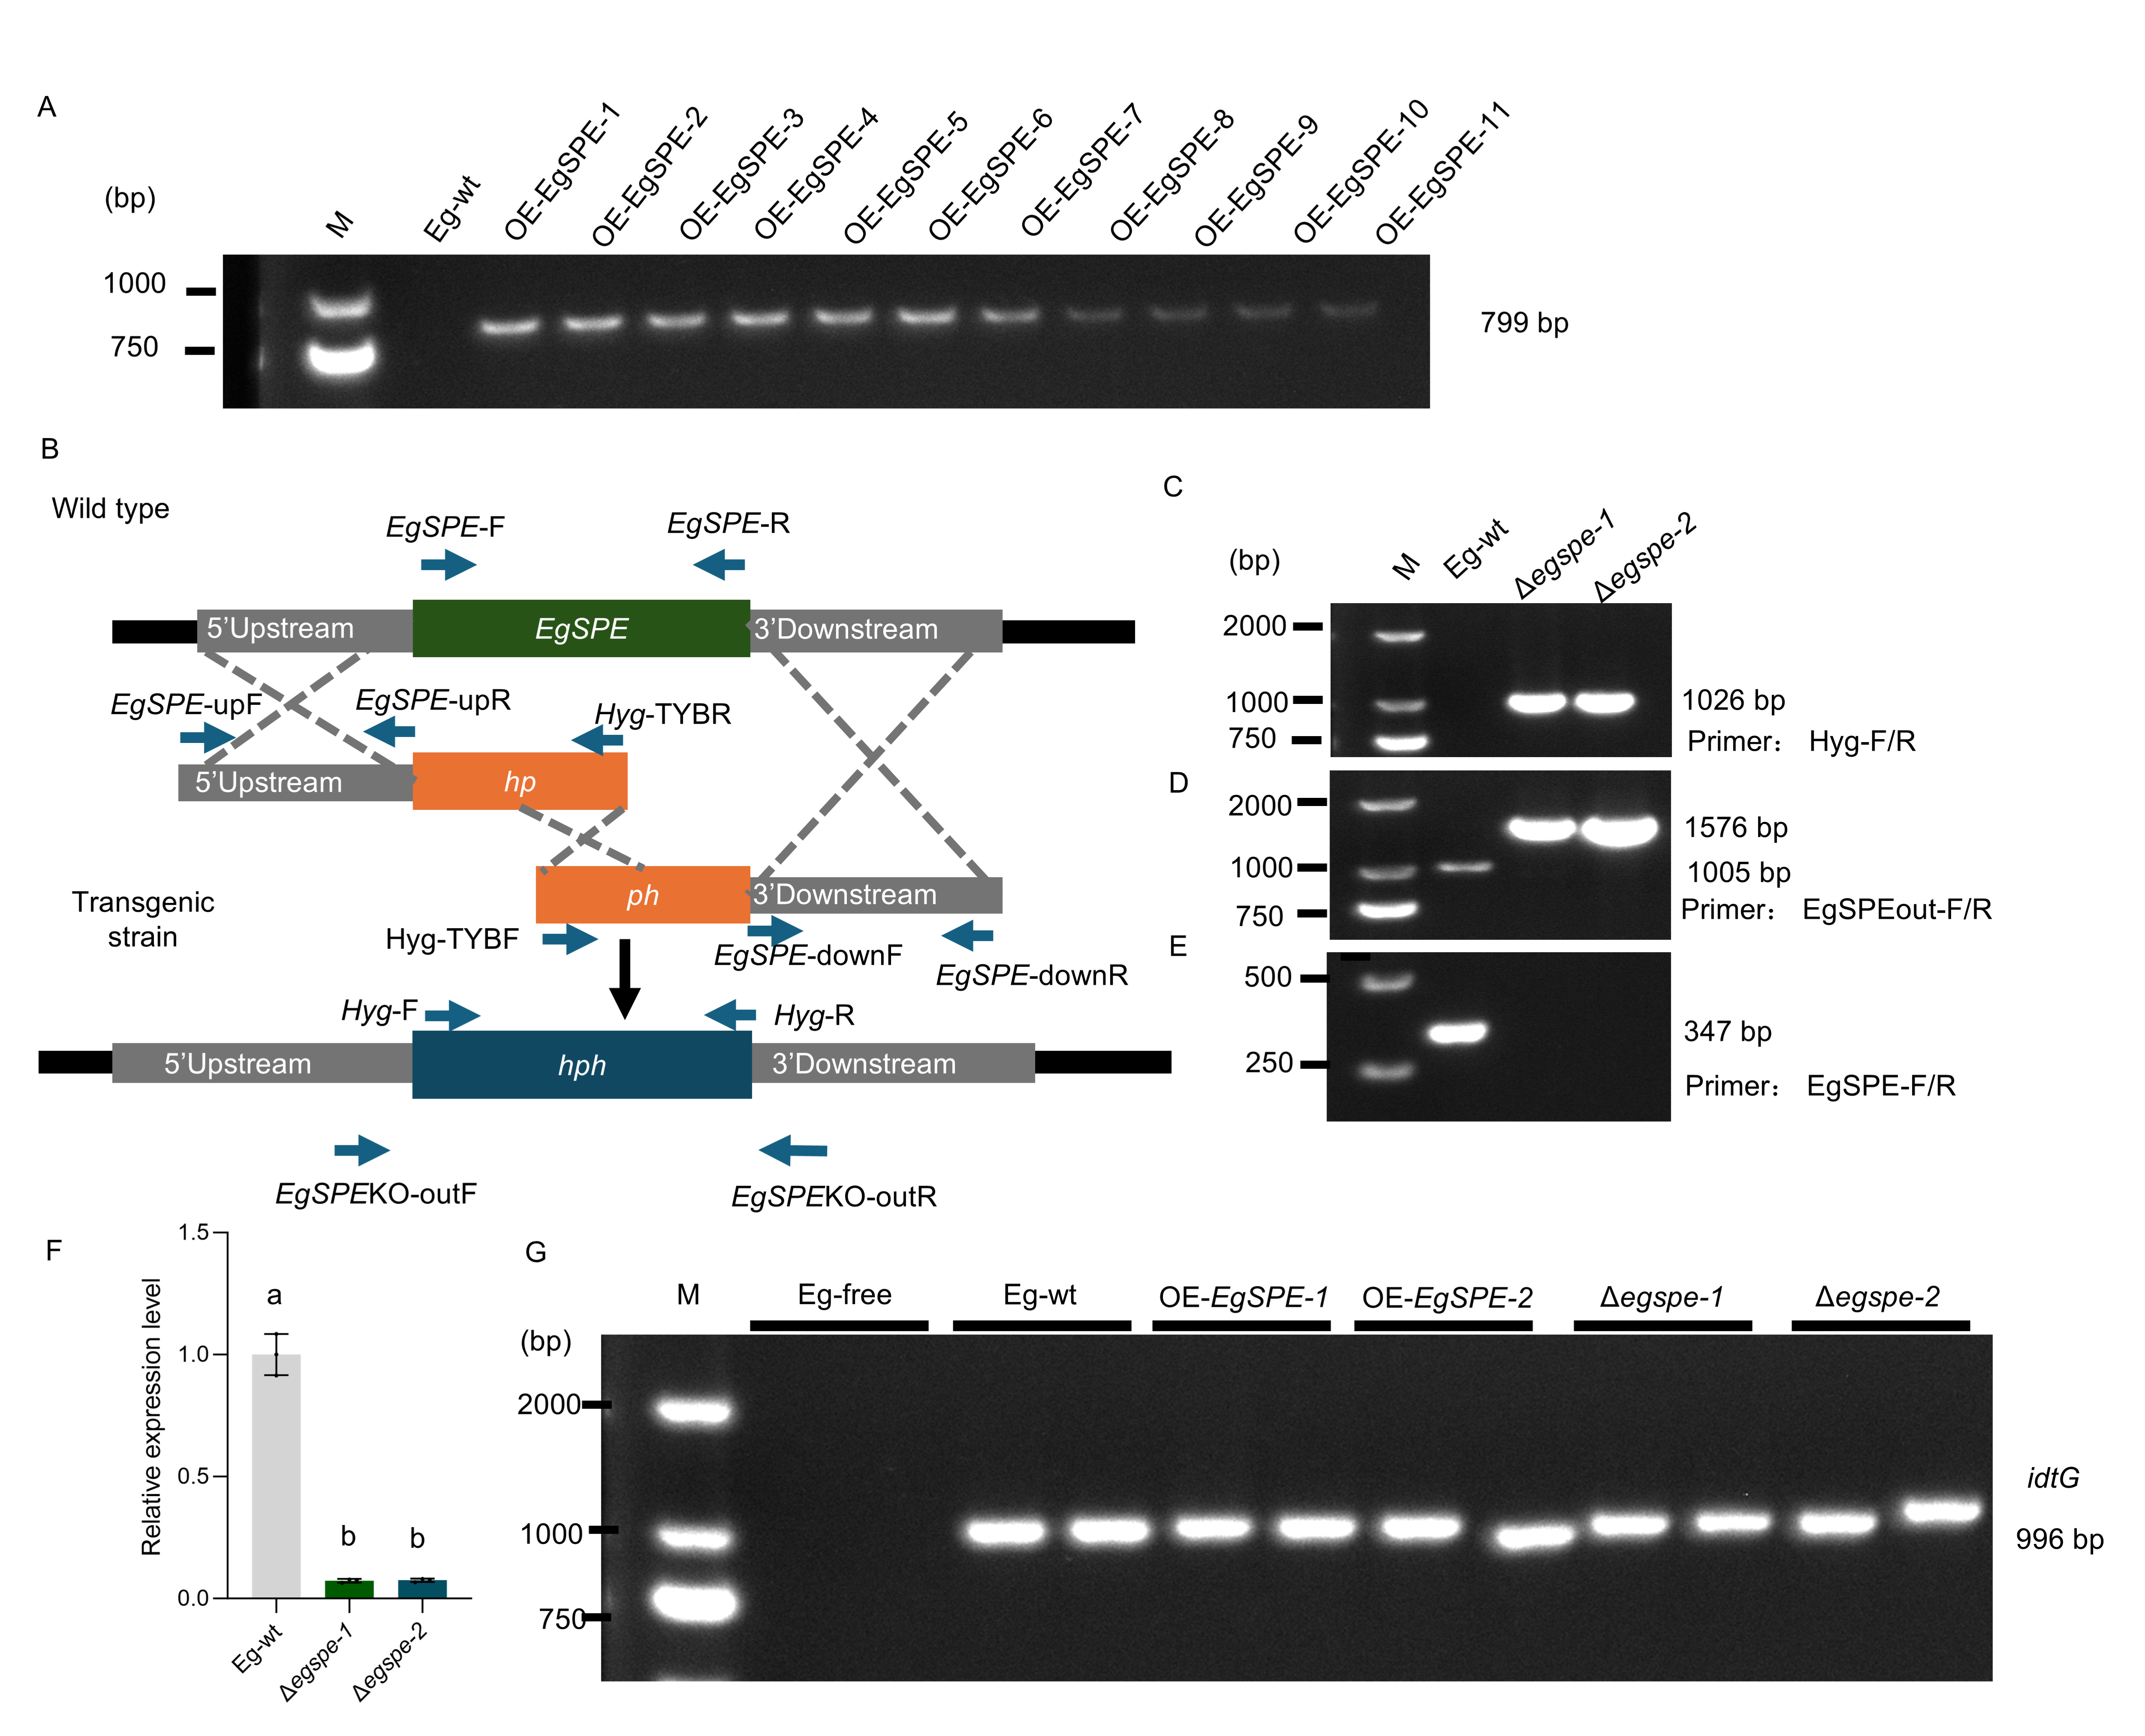

Supplement: Supplementary file 2 [file b462209114dd13a4bb65f32d.docx]
